# Supplementary material for: Strain-level metagenomic assignment and compositional estimation for long reads with MetaMaps
Source: Nat Commun. 2019 Jul 11;10:3066. doi: 10.1038/s41467-019-10934-2 (PMC6624308; doi:10.1038/s41467-019-10934-2)
Supplement: Supplementary file 1 — Supplementary Information [file 41467_2019_10934_MOESM1_ESM.pdf]

## **Supplementary Information**

### **Strain-level metagenomic assignment and compositional estimation for long reads with MetaMaps**

Dilthey et al.

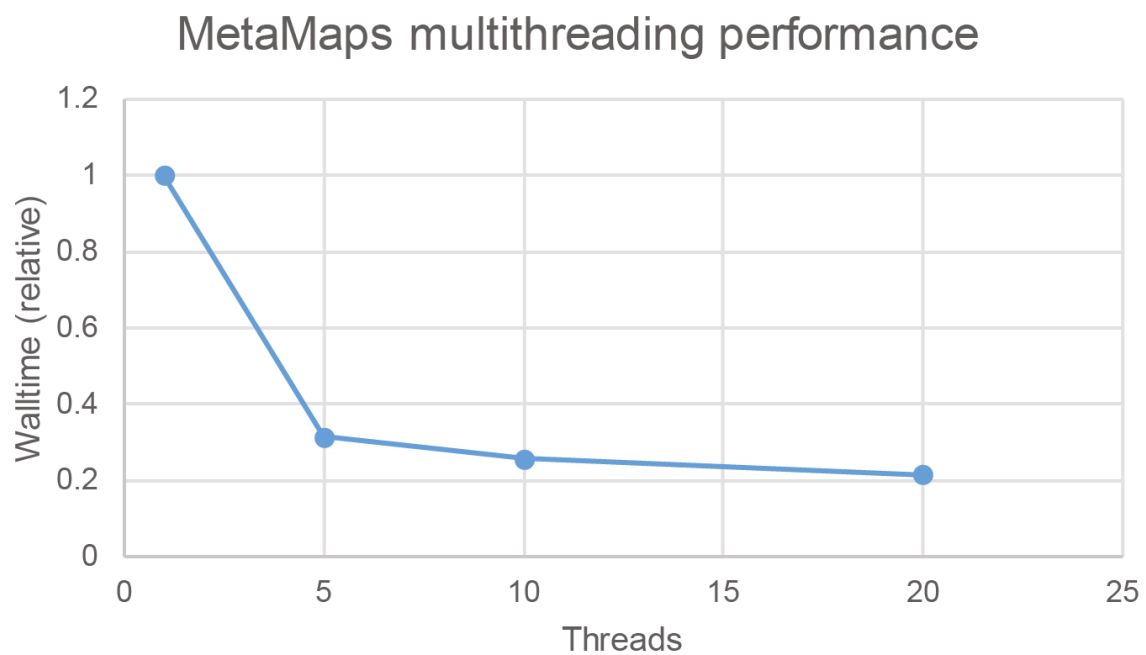

**Supplementary Figure 1. MetaMaps multithreading performance.** Relative runtime (wall time) of MetaMaps, measured on HMP7 data, depending on the number of utilized CPU cores.

| Reads  | Reads % | COG group                                                           |
|--------|---------|---------------------------------------------------------------------|
| 390    | 0.14%   | A RNA processing and modification                                   |
| 399    | 0.15%   | B Chromatin structure and dynamics                                  |
| 47263  | 17.31%  | C Energy production and conversion                                  |
| 12889  | 4.72%   | D Cell cycle control, cell division, chromosome partitioning        |
| 68289  | 25.02%  | E Amino acid transport and metabolism                               |
| 29636  | 10.86%  | F Nucleotide transport and metabolism                               |
| 58230  | 21.33%  | G Carbohydrate transport and metabolism                             |
| 31347  | 11.48%  | H Coenzyme transport and metabolism                                 |
| 26591  | 9.74%   | I Lipid transport and metabolism                                    |
| 49020  | 17.96%  | J Translation, ribosomal structure and biogenesis                   |
| 70430  | 25.80%  | K Transcription                                                     |
| 61699  | 22.60%  | L Replication, recombination and repair                             |
| 59690  | 21.87%  | M Cell wall/membrane/envelope biogenesis                            |
| 12514  | 4.58%   | N Cell motility                                                     |
| 37550  | 13.76%  | O Post-translational modification, protein turnover, and chaperones |
| 55657  | 20.39%  | P Inorganic ion transport and metabolism                            |
| 13808  | 5.06%   | Q Secondary metabolites biosynthesis, transport, and catabolism     |
| 154932 | 56.76%  | S Function unknown                                                  |
| 33782  | 12.38%  | T Signal transduction mechanisms                                    |
| 18251  | 6.69%   | U Intracellular trafficking, secretion, and vesicular transport     |
| 24103  | 8.83%   | V Defense mechanisms                                                |
| 408    | 0.15%   | W Extracellular structures                                          |
| 116    | 0.04%   | Y Nuclear structure                                                 |
| 131    | 0.05%   | Z Cytoskeleton                                                      |

**Supplementary Figure 2. COG (Clusters of Orthologous Genes) analysis of the HMP7 data.** HMP7 reads are mapped against a COG-annotated version of the MetaMaps database, and the number of reads overlapping with genes annotated with specific COG groups is tabulated.

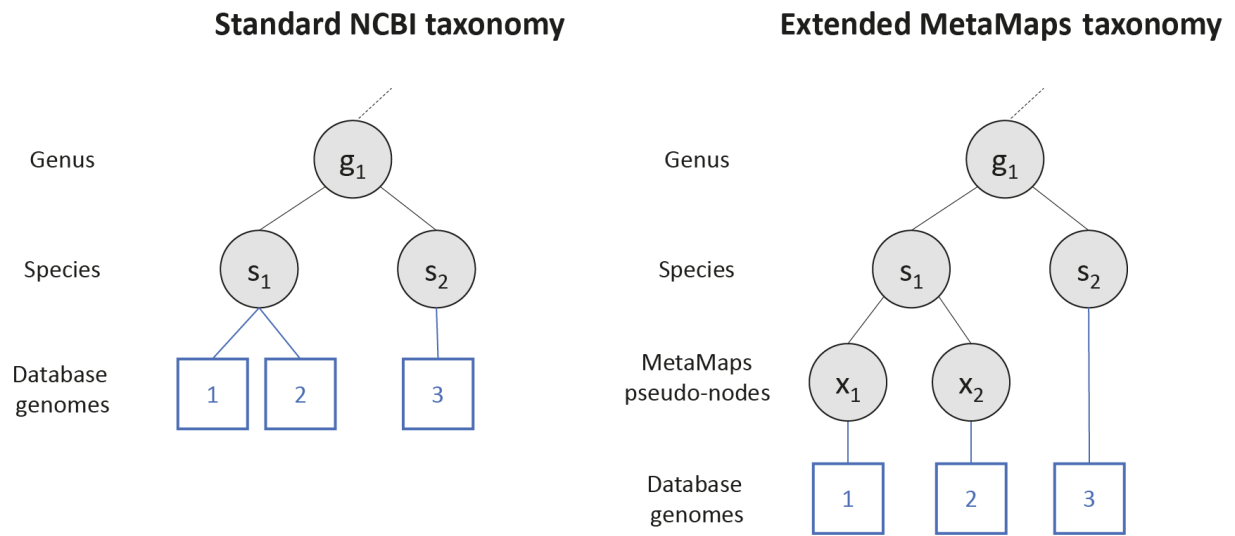

**Supplementary Figure 3. The extended MetaMaps taxonomy.** MetaMaps uses an extended version of the NCBI taxonomy in which each reference database genome has a unique taxon ID. This is constructed by creating additional pseudo taxon IDs (prefixed with an 'x'), which distinguish between genomes attached to the same node in the original NCBI taxonomy.

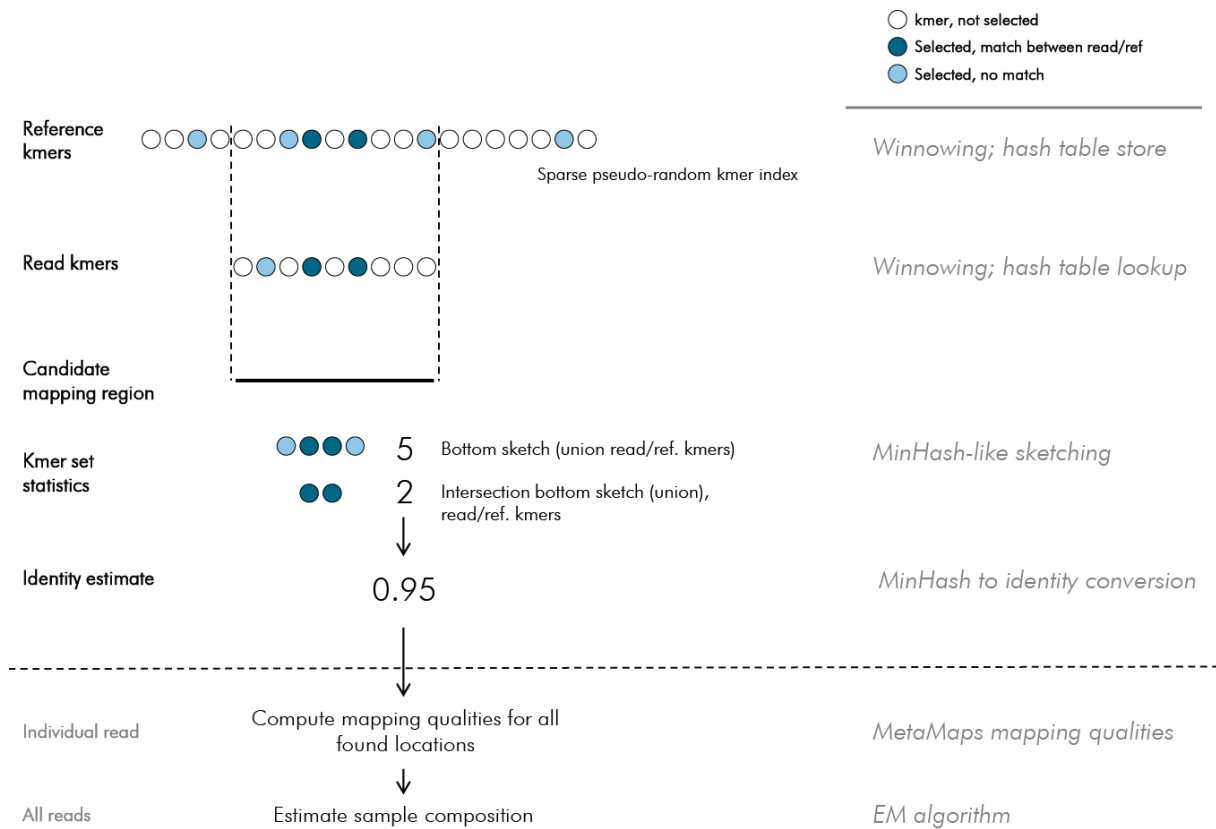

**Supplementary Figure 4. High-level overview of the approximate mapping algorithm (MashMap).** Minimizers are selected from the reference and from the reads. Minimizer matches between read and reference are identified using a hash table, inducing candidate mapping locations. Minimizer density is determined based on minimum read length and alignment identity. For each candidate mapping location, we use a winnowed-minhash approach, based on read and reference minimizers, to estimate the Jaccard similarity between the full kmer sets of the read and the candidate mapping location, and convert this estimate into an estimate of alignment identity. The steps below the dashed line show the subsequent steps of mapping quality computation and EM-based sample composition estimation.

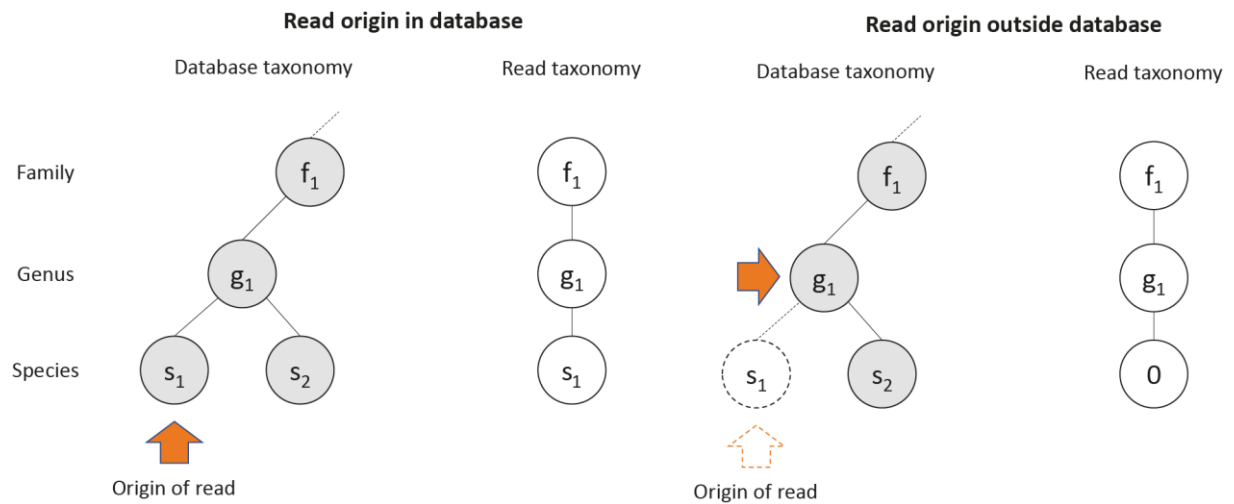

**Supplementary Figure 5. Evaluation in the presence of out-of-database genomes.** In some experiments, not all genomes present in the input data are present in the reference database. We assign reads that emanate from out-of-database entities to the taxonomic node that represents the most recent common ancestor of the read's source genome and its next-closest database relative; and for all taxonomic levels below the most-recent-common-ancestor node, true read assignment is defined as "Unassigned" (special taxon ID 0).

| Experiment                                             | Kraken/Bracken |                  | Kraken2   |                  | Centrifuge |                  | LAST+MEGAN-LR |                  | MetaMaps  |                  |
|--------------------------------------------------------|----------------|------------------|-----------|------------------|------------|------------------|---------------|------------------|-----------|------------------|
|                                                        | CPU hours      | Peak memory (GB) | CPU hours | Peak memory (GB) | CPU hours  | Peak memory (GB) | CPU hours     | Peak memory (GB) | CPU hours | Peak memory (GB) |
| i100                                                   | 0,20           | 154              | 0,05      | 21               | 0,32       | 11               | 6,01          | 20               | 16,64     | 262              |
| p25                                                    | 0,16           | 154              | 0,05      | 21               | 0,17       | 11               | 5,36          | 20               | 28,48     | 262              |
| HMP7                                                   | 0,25           | 154              | 0,15      | 21               | 0,21       | 11               | 7,65          | 20               | 30,80     | 262              |
| Zymo                                                   | 1,67           | 154              | 0,33      | 21               | 0,97       | 12               | 27,12         | 79               | 209,89    | 262              |
| Cami                                                   | 0,82           | 154              | 0,36      | 21               | 0,72       | 11               | 18,14         | 26               | 17,83     | 262              |
| i100 (limited memory 20GB, MetaMaps only)              | NA             | NA               | NA        | NA               | NA         | NA               | NA            | NA               | 22,00     | 28               |
| i100 (limited memory 10GB, MetaMaps only)              | NA             | NA               | NA        | NA               | NA         | NA               | NA            | NA               | 24,00     | 16               |
| i100 (read length 2000, MetaMaps only)                 | NA             | NA               | NA        | NA               | NA         | NA               | NA            | NA               | 15,23     | 139              |
| HMP7 (limited memory 20GB, MetaMaps only)              | NA             | NA               | NA        | NA               | NA         | NA               | NA            | NA               | 36,75     | 28               |
| HMP7 (limited memory 10GB, MetaMaps only, threads = 5) | NA             | NA               | NA        | NA               | NA         | NA               | NA            | NA               | 40,89     | 16               |
| HMP7 (read length 2000, MetaMaps only)                 | NA             | NA               | NA        | NA               | NA         | NA               | NA            | NA               | 14,13     | 139              |

**Supplementary Table 1. CPU time and peak memory on simulated and real data.** The i100 “limited memory” experiment was run with a target maximum memory amount of 20GB (`--maxmemory 20`).
